# Supplementary material
Source: PubMed Central journal article supplement (PMC7015554)
Supplement: ehp-128-016002-s002.pdf [file ehp-128-016002-s002.pdf]

**Note to readers with disabilities:** *EHP* strives to ensure that all journal content is accessible to all readers. However, some figures and Supplemental Material published in *EHP* articles may not conform to [508 standards](#) due to the complexity of the information being presented. If you need assistance accessing journal content, please contact [ehp508@niehs.nih.gov](mailto:ehp508@niehs.nih.gov). Our staff will work with you to assess and meet your accessibility needs within 3 working days.

### **Supplemental Material**

#### **Solar Ultraviolet Radiation and Breast Cancer Risk: A Systematic Review and Meta-Analysis**

Troy W. R. Hiller, Dylan E. O'Sullivan, Darren R. Brenner, Cheryl E. Peters, and Will D. King

#### **Table of Contents**

##### **Search strategies**

**Table S1.** Evaluation of study quality and risk of bias for case control studies included in the meta-analyses.

**Table S2.** Evaluation of study quality and risk of bias for cohort studies included in the meta-analyses.

**Table S3.** Sensitivity analyses investigating the effects of assumptions made in time spent in the sun analyses.

**Table S4.** Studies included in each of the analyses of time spent in the sun stratified by exposure window.

**Table S5.** Studies included in the subgroup analyses by study quality factors.

**Figure S1.** Funnel plot for lifetime  $< 1$  vs  $\geq 1$  hour spent in the sun per day. The outer dashed lines indicate the triangular region within which 95% of studies are expected to lie in the absence of bias. The solid black line corresponds to the summary effect estimate. The black dots correspond to studies included in this analysis (Knight et al. 2007, Anderson et al. 2011, John et al. 1999, John et al. 2007, Millen et al. 2009, Engel et al. 2014, Bidgoli & Azarshab 2014, Cauchi et al. 2016, Zamoiski et al. 2016). The white dot corresponds to one unpublished study suggested by the trim and fill method.

**Figure S2.** Funnel plot for ambient UVR exposure. The outer dashed lines indicate the triangular region within which 95% of studies are expected to lie in the absence of bias. The solid black line corresponds to the summary effect estimate. The black dots correspond to studies included in this analysis (Edvardsen et al. 2011, Engel et al., 2011, Anderson et al. 2011, John et al. 1999, Millen et al. 2009, Zamoiski et al. 2016, Lin et al. 2012).

## **References**
